# Supplementary material
Source: PubMed Central journal article supplement (PMC4911242)
Supplement: NIHMS754086-supplement-Table_showing_descriptive_statistics_of_full_NHANES_2003-2006_sample_aged_50-79.pdf [file NIHMS754086-supplement-Table_showing_descriptive_statistics_of_full_NHANES_2003-2006_sample_aged_50-79.pdf]

**Supplemental Digital Content 1:**  
**Baseline characteristics of full NHANES sample aged 50-79**

| Variable                                  | Mean   | 95% CI for mean |
|-------------------------------------------|--------|-----------------|
| Sociodemographic characteristics          |        |                 |
| Age (years)                               | 61.380 | [60.87,61.89]   |
| Female (%)                                | 0.528  | [0.51,0.54]     |
| White (%)                                 | 0.790  | [0.74,0.83]     |
| Black (%)                                 | 0.098  | [0.07,0.12]     |
| Hispanic (%)                              | 0.067  | [0.04,0.09]     |
| < HS education (%)                        | 0.097  | [0.08,0.12]     |
| > HS education (%)                        | 0.257  | [0.21,0.30]     |
| Health behaviors and prevalent conditions |        |                 |
| Current smoker (%)                        | 0.186  | [0.17,0.21]     |
| BMI (kg/m <sup>2</sup> )                  | 29.012 | [28.70,29.32]   |
| Diabetes (%)                              | 0.147  | [0.13,0.16]     |
| CHD (%)                                   | 0.076  | [0.06,0.09]     |
| CHF (%)                                   | 0.046  | [0.04,0.05]     |
| Stroke (%)                                | 0.047  | [0.04,0.06]     |
| Cancer (%)                                | 0.149  | [0.14,0.16]     |
| Mobility lim. (%)                         | 0.161  | [0.15,0.18]     |
| N subjects (unweighted)                   | 4650   |                 |

Data: NHANES, 2003-2006.  
 Adults age 50 to 79 at baseline interview.  
 Means and SEs that give rise to CIs are weighted to reflect complex survey characteristics of NHANES.
