# Supplementary material
Source: PubMed Central journal article supplement (PMC4911242)
Supplement: NIHMS754086-supplement-Table_showing_model_fit_statistics_corresponding_to_models_presented_in_main_text.pdf [file NIHMS754086-supplement-Table_showing_model_fit_statistics_corresponding_to_models_presented_in_main_text.pdf]

## Supplemental Digital Content 4: Model fit statistics

### **Activity counts by tertile (Corresponds to Table 2)**

| Total Activity | Model A  | Model B  | Model C  |
|----------------|----------|----------|----------|
| Log Likelihood | -2125.26 | -2078.12 | -492.502 |
| AIC            | 4272.513 | 4196.246 | 1013.004 |
| BIC            | 4338.689 | 4316.566 | 1088.336 |

| Light Activity | Model A  | Model B  | Model C  |
|----------------|----------|----------|----------|
| Log Likelihood | -2134.32 | -2083.58 | -494.967 |
| AIC            | 4290.643 | 4207.163 | 1017.934 |
| BIC            | 4356.819 | 4327.483 | 1093.266 |

| MVPA           | Model A  | Model B  | Model C  |
|----------------|----------|----------|----------|
| Log Likelihood | -2139.29 | -2088.95 | -490.928 |
| AIC            | 4300.582 | 4217.892 | 1009.856 |
| BIC            | 4366.758 | 4338.212 | 1085.188 |

### **Isotemporal substitution (Corresponds to Table 3)**

| Replacing Sedentary Minutes | Model A  | Model B  | Model C  |
|-----------------------------|----------|----------|----------|
| Log Likelihood              | -2113.23 | -2067.95 | -488.878 |
| AIC                         | 4250.453 | 4177.892 | 1007.756 |
| BIC                         | 4374.568 | 4395.093 | 1153.75  |

| Replacing MVPA Minutes | Model A  | Model B  | Model C  |
|------------------------|----------|----------|----------|
| Log Likelihood         | -2113.22 | -2067.94 | -488.877 |
| AIC                    | 4250.445 | 4177.887 | 1007.754 |
| BIC                    | 4374.56  | 4395.087 | 1153.748 |

To obtain these statistics, sampling weights were rescaled to sum to the sample size (n=3,029 for Models A and B, n=1,605 for Model C), rather than the population size. Then models were fit using maximum likelihood, rather than survey design-based estimation. Strata and primary sampling units were entered as covariates, rather than as components of a design-based variance estimator. Other covariates were the same as in the results reported in Tables 2 and 3.
