# Supplementary material
Source: PubMed Central journal article supplement (PMC4911242)
Supplement: NIHMS754086-supplement-Table_showing_variance_inflation_factors_for_models_presented_in_main_text.pdf [file NIHMS754086-supplement-Table_showing_variance_inflation_factors_for_models_presented_in_main_text.pdf]

### Supplemental Digital Content 3: Variance Inflation Factors (VIF)

#### VIF Corresponding to Models in Table 2

*Activity volume (counts) by tertile, Model B (full set of covariates)*

| Variable                   | VIF   |
|----------------------------|-------|
| Tertile of Total Activity: |       |
| 2                          | 1.662 |
| 3                          | 2.029 |
| Tertile of Light Activity: |       |
| 2                          | 1.613 |
| 3                          | 1.827 |
| Tertile of MVPA:           |       |
| 2                          | 1.631 |
| 3                          | 2.058 |

#### VIF Corresponding to Models in Table 3

*Isotemporal Substitution, Model B (full set of covariates)*

| Variable                        | VIF    |
|---------------------------------|--------|
| Replacing 10 Sedentary Minutes: |        |
| MVPA minutes                    | 1.339  |
| Light minutes                   | 1.311  |
| Replacing 10 MVPA Minutes:      |        |
| Light Minutes                   | 42.075 |
| Sedentary Minutes               | 74.321 |

MVPA = Moderate-to-vigorous physical activity.  
Formula used was  $VIF = 1/(1-R^2)$ , where  $R^2$  is the  $R^2$  obtained from a linear regression of the given variable onto the rest of the covariates using the *svy: reg* command in Stata. Covariates used were those in Model B (the full set of covariates), as described in the text.
