# Supplementary material
Source: PubMed Central journal article supplement (PMC4911242)

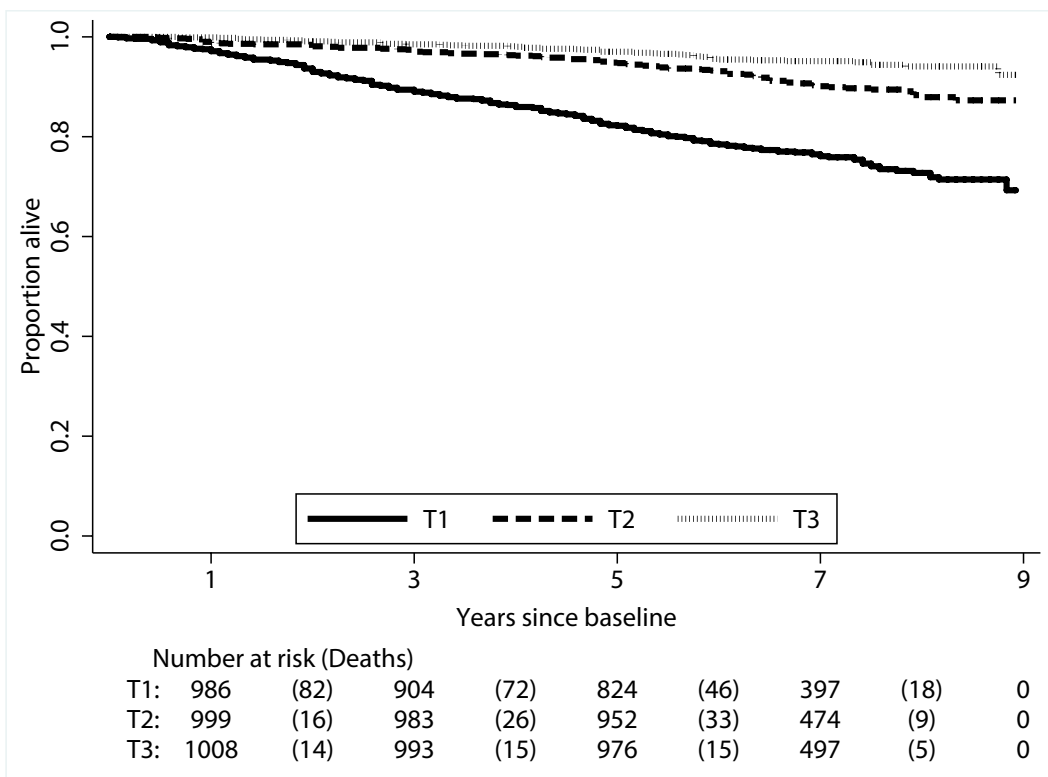

Supplement: NIHMS754086-supplement-Figure_showing_Kaplan-Meier_survival_curves_by_tertile_of_MVPA.pdf [file NIHMS754086-supplement-Figure_showing_Kaplan-Meier_survival_curves_by_tertile_of_MVPA.pdf]
